# Supplementary material for: Computational Identification of Dithymoquinone as a Potential Inhibitor of Myostatin and Regulator of Muscle Mass
Source: MDPI journal article supplement (doi:10.3390/molecules26175407), 2021-09-06
Supplement: s1 [file s1]

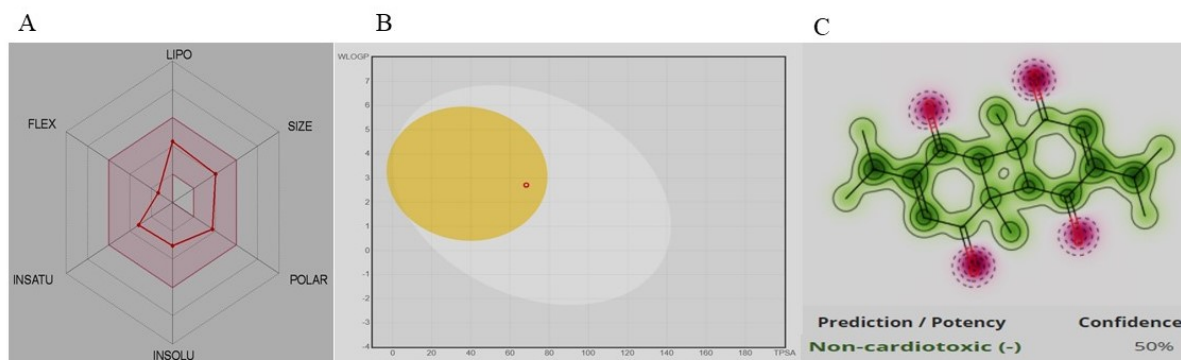

**Figure S1.** Graphical representation of the physicochemical properties of dithymoquinone **A)** bioavailability radar (left), **B)** BOILED-Egg analysis (middle), **C)** level of cardiotoxicity (right).

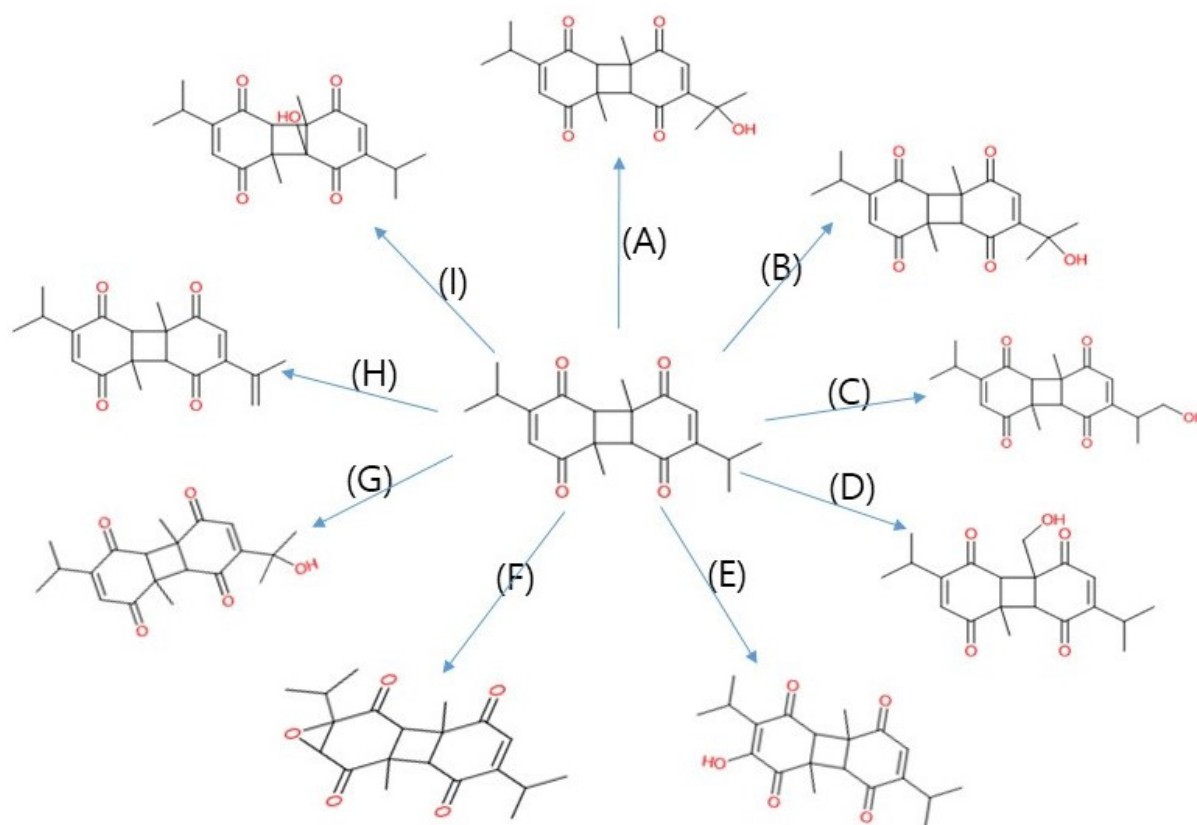

**Figure S2.** Biotransformation of dithymoquinone into different metabolites as determined by phase one (CYP450) transformation. A) Allylic hydroxylation, B) Hydroxylation, C) Hydroxylation of the terminal methyl, D) Hydroxylation of the methyl carbon adjacent to the aliphatic ring of dithymoquinone, E) Hydroxylation of the carbon alpha to the conjugated carbonyl of dithymoquinone, F) Epoxidation of alkene, G) Hydroxylation of the carbon gamma to the conjugated carbonyl, H) Terminal desaturation, I) Alpha hydroxylation of the carbonyl group of dithymoquinone.

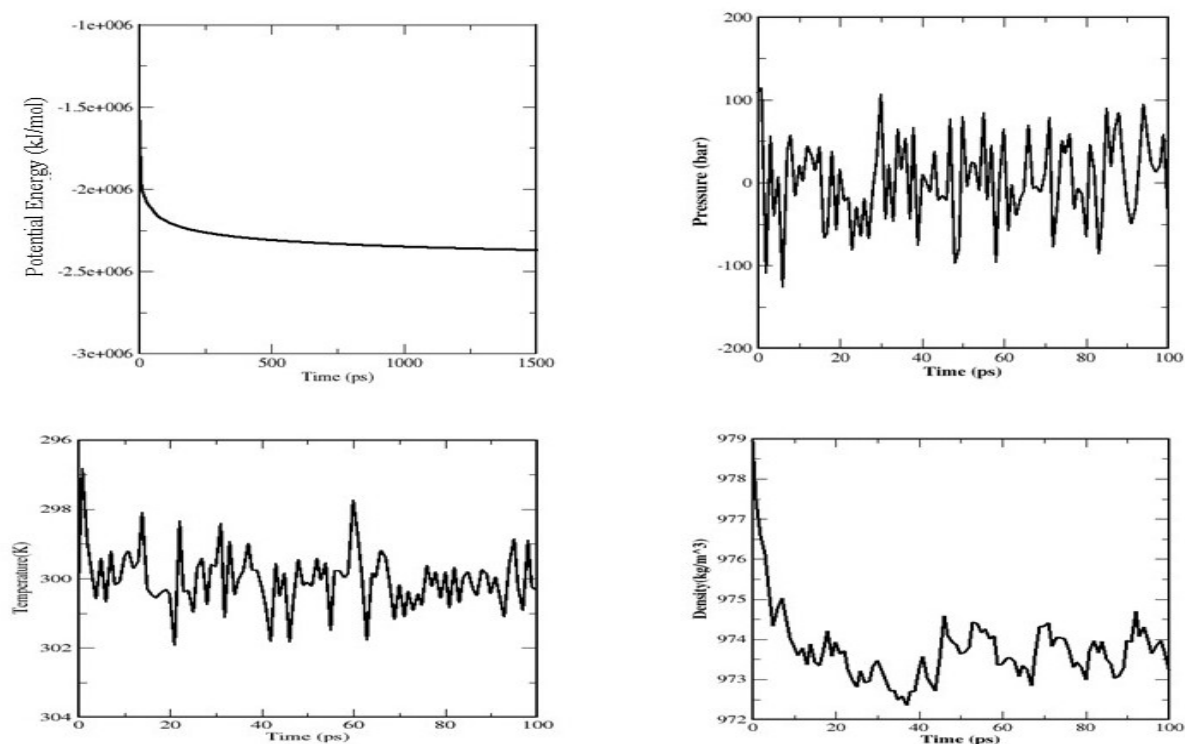

**Figure S3.** Graphical representation of **A)** potential energy, **B)** pressure, **C)** temperature, and **D)** density of dithymoquinone-MSTN complex.

**Table S1.** List of top 20 selected compounds with binding energy against myostatin obtained by AutoDock.

| Compounds name | Binding energy (kcal/mol) | PubChem ID | Structure |
|----------------|---------------------------|------------|-----------|
| Dithymoquinone | -7.40                     | 398941     |           |
| Calycosin      | -6.60                     | 5280448    |           |
| Limonin        | -6.85                     | 179651     |           |
| Nigellidine    | -6.82                     | 136828302  |           |
| Thymoquinone   | -5.21                     | 10281      |           |
| Galangin       | -6.63                     | 5281616    |           |

|                    |       |           |                                                                                       |
|--------------------|-------|-----------|---------------------------------------------------------------------------------------|
| Carvacrol          | -6.10 | 10364     | 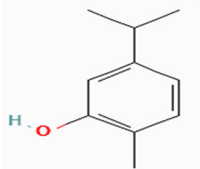   |
| Kaempferol         | -6.60 | 5280863   |    |
| Thymol             | -6.10 | 6989      |    |
| Carvone            | -6.09 | 7439      |    |
| Limonenes          | -6.21 | 405234158 |   |
| Citronellol        | -6.01 | 8842      |  |
| Thymohydroquinone  | -6.68 | 95779     |  |
| Nigellicine        | -6.30 | 11402337  |  |
| Nigellimine        | -6.14 | 20725     |  |
| Chloroquine        | -6.65 | 2719      |  |
| Hydroxychloroquine | -6.68 | 3652      |  |

|           |       |          |                                                                                     |
|-----------|-------|----------|-------------------------------------------------------------------------------------|
| Coumarins | -6.35 | 54678486 | 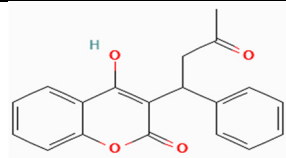 |
| Stilbenes | -6.23 | 638088   |  |
| Sesamin   | -6.31 | 72307    |  |
